# Supplementary material
Source: MDPI journal article supplement (https://www.mdpi.com/2073-4395/13/4/953)
Supplement: s1 [file s1]

## Supplementary Materials

**Table S1. Details of CAPS markers used in this study.** In the table, the physical position of the expected sequence fragment is given. The primers and the polymorphic SNP on which the marker was designed are also given in the table.

| CAPS marker | Location                       | Primer sequence (5'-3')                             | SNP                         |
|-------------|--------------------------------|-----------------------------------------------------|-----------------------------|
| Q7M1        | SL3.0ch07:1055917..1060714     | CTATGGGAGACTCAACGTAT<br>ATCCTCTCCAAGTTAAACG         | GGAACAGGAG [T/C] TCCACCTCC  |
| Q7M2        | SL3.0ch07:1506409..1518012     | ACCAGTTCTACTTGAAAAGAA<br>ACGATTAAGGTAGAGGCCAAGG     | TCTACGAAAT [T/A] TTATGTGCT  |
| Q7M3        | SL3.0ch07:1574953..1577763     | CACAAGACATTGAGTGTTTCATTGAT<br>TGCAACATGTCCTTAAGTGGA | GTTATTGGTA [T/C] TAGCAGGAC  |
| Q7M4        | SL3.0ch07:<br>1624160..1636142 | TTGTATTGTTTTCTAGGATTGA<br>GCATGAAGAAAGTAAGGGGACT    | GAAGTGTAGC [T/A] TTCCCCGGT  |
| Q7M5        | SL3.0ch07:1754891..1758020     | TGGCTTTACAACCAAAGATCA<br>TCCAAATATAACCCTGCCAAA      | CGCGTAAGTA [T/C] TTTTCATCGT |
| Q7M7        | SL3.0ch07:1266878..1270553     | AACGTGAGATCACACGAAC<br>CGCGAAAAACAACAATTTA          | GTTACCATAGT [G/A] CATATCTT  |
| Q7M9        | SL3.0ch07:1783293..1787487     | ATAGGTGGTTGGTAGTACGTA<br>TTATTTTCCTTGTTCGATTAAGC    | GAAACTTTTT [T/A] AAGATAAAT  |

**Table S2. Locations on the *S. lycopersicum* ITAG4.0 reference genome with resistant specific coverage.**

| Chromosome | Start    | End      | Gene             | Gene function              |
|------------|----------|----------|------------------|----------------------------|
| SL4.0ch02  | 43262484 | 43262515 |                  |                            |
| SL4.0ch02  | 43262515 | 43262546 |                  |                            |
| SL4.0ch02  | 43262546 | 43262577 |                  |                            |
| SL4.0ch02  | 43899410 | 43899441 |                  |                            |
| SL4.0ch02  | 45861090 | 45861121 | Solyc02g084740.4 | Cytochrome P450            |
| SL4.0ch02  | 45861121 | 45861152 | Solyc02g084740.4 | Cytochrome P450            |
| SL4.0ch02  | 46120963 | 46120994 |                  |                            |
| SL4.0ch02  | 48143496 | 48143527 |                  |                            |
| SL4.0ch03  | 46778783 | 46778814 |                  |                            |
| SL4.0ch04  | 63165755 | 63165786 | Solyc04g081190.3 | Vsf-1 transcription factor |
| SL4.0ch04  | 63767899 | 63767930 |                  |                            |
| SL4.0ch05  | 2574426  | 2574457  |                  |                            |
| SL4.0ch07  | 61619289 | 61619320 |                  |                            |
| SL4.0ch10  | 20068811 | 20068842 |                  |                            |
| SL4.0ch11  | 10668123 | 10668154 |                  |                            |
| SL4.0ch12  | 44524339 | 44524370 |                  |                            |

**Table S3. Locations on the *S. lycopersicum* ITAG4.0 reference genome with susceptible specific coverage.**

| Chromosome | Start    | End      | Gene | Gene function |
|------------|----------|----------|------|---------------|
| SL4.0ch01  | 1850483  | 1850514  |      |               |
| SL4.0ch01  | 51678519 | 51678550 |      |               |
| SL4.0ch01  | 69201641 | 69201672 |      |               |
| SL4.0ch02  | 29817877 | 29817908 |      |               |
| SL4.0ch02  | 29817939 | 29817970 |      |               |
| SL4.0ch02  | 33193901 | 33193932 |      |               |
| SL4.0ch02  | 42609345 | 42609376 |      |               |
| SL4.0ch02  | 42727858 | 42727889 |      |               |

|           |          |          |                  |                                                  |
|-----------|----------|----------|------------------|--------------------------------------------------|
| SL4.0ch02 | 42789083 | 42789114 | Solyc02g080620.3 | Prephenate dehydratase family protein            |
| SL4.0ch02 | 42852137 | 42852168 |                  |                                                  |
| SL4.0ch02 | 42930195 | 42930226 | Solyc02g080820.3 | Peroxisomal membrane protein PMP22               |
| SL4.0ch02 | 42936178 | 42936209 |                  |                                                  |
| SL4.0ch02 | 42936209 | 42936240 |                  |                                                  |
| SL4.0ch02 | 42936240 | 42936271 |                  |                                                  |
| SL4.0ch02 | 43090062 | 43090093 |                  |                                                  |
| SL4.0ch02 | 43090093 | 43090124 |                  |                                                  |
| SL4.0ch02 | 43600787 | 43600818 |                  |                                                  |
| SL4.0ch02 | 44461967 | 44461998 | Solyc02g082810.3 | CCA-adding enzyme                                |
| SL4.0ch02 | 44461998 | 44462029 | Solyc02g082810.3 | CCA-adding enzyme                                |
| SL4.0ch02 | 44491634 | 44491665 | Solyc02g082840.3 | Protein GRIP                                     |
| SL4.0ch02 | 45195985 | 45196016 |                  |                                                  |
| SL4.0ch02 | 45527778 | 45527809 |                  |                                                  |
| SL4.0ch02 | 45695488 | 45695519 |                  |                                                  |
| SL4.0ch02 | 45939117 | 45939148 |                  |                                                  |
| SL4.0ch02 | 46164487 | 46164518 |                  |                                                  |
| SL4.0ch02 | 46277296 | 46277327 |                  |                                                  |
| SL4.0ch02 | 46325687 | 46325718 | Solyc02g085390.4 | Uncharacterized ATP-dependent helicase C25A8.01c |
| SL4.0ch02 | 46378883 | 46378914 |                  |                                                  |
| SL4.0ch02 | 46424050 | 46424081 |                  |                                                  |
| SL4.0ch02 | 46478455 | 46478486 |                  |                                                  |
| SL4.0ch02 | 46542377 | 46542408 |                  |                                                  |
| SL4.0ch02 | 46579360 | 46579391 | Solyc02g085790.3 | T-complex protein 1 subunit zeta                 |
| SL4.0ch02 | 46579391 | 46579422 | Solyc02g085790.3 | T-complex protein 1 subunit zeta                 |
| SL4.0ch02 | 46672298 | 46672329 |                  |                                                  |
| SL4.0ch02 | 46672329 | 46672360 |                  |                                                  |
| SL4.0ch02 | 46672360 | 46672391 |                  |                                                  |
| SL4.0ch02 | 46888988 | 46889019 |                  |                                                  |
| SL4.0ch02 | 46889019 | 46889050 |                  |                                                  |
| SL4.0ch02 | 46999596 | 46999627 | Solyc02g086270.4 | Receptor-like kinase                             |
| SL4.0ch02 | 47230236 | 47230267 | Solyc02g086550.3 | Os06g0661900 protein                             |
| SL4.0ch02 | 47230267 | 47230298 | Solyc02g086550.3 | Os06g0661900 protein                             |
| SL4.0ch02 | 47405696 | 47405727 |                  |                                                  |
| SL4.0ch02 | 48085154 | 48085185 |                  |                                                  |
| SL4.0ch02 | 48085216 | 48085247 |                  |                                                  |
| SL4.0ch02 | 48143496 | 48143527 |                  |                                                  |
| SL4.0ch02 | 48193778 | 48193809 |                  |                                                  |
| SL4.0ch02 | 48380336 | 48380367 |                  |                                                  |
| SL4.0ch02 | 48655120 | 48655151 |                  |                                                  |
| SL4.0ch02 | 48829898 | 48829929 |                  |                                                  |
| SL4.0ch02 | 49070210 | 49070241 | Solyc02g089150.4 | MAPprotein kinase-like protein                   |
| SL4.0ch02 | 49282281 | 49282312 |                  |                                                  |
| SL4.0ch02 | 49286497 | 49286528 |                  |                                                  |
| SL4.0ch02 | 49770159 | 49770190 |                  |                                                  |
| SL4.0ch02 | 49770190 | 49770221 |                  |                                                  |
| SL4.0ch03 | 16906501 | 16906532 |                  |                                                  |
| SL4.0ch03 | 50748116 | 50748147 |                  |                                                  |
| SL4.0ch04 | 4253913  | 4253944  |                  |                                                  |
| SL4.0ch04 | 27998921 | 27998952 |                  |                                                  |
| SL4.0ch04 | 31211575 | 31211606 |                  |                                                  |
| SL4.0ch04 | 51481266 | 51481297 |                  |                                                  |
| SL4.0ch04 | 53085919 | 53085950 |                  |                                                  |
| SL4.0ch04 | 61408241 | 61408272 |                  |                                                  |
| SL4.0ch04 | 61614174 | 61614205 | Solyc04g079040.4 | Serine carboxypeptidase 1                        |

|           |          |          |                  |                                                          |
|-----------|----------|----------|------------------|----------------------------------------------------------|
| SL4.0ch04 | 61614205 | 61614236 | Solyc04g079040.4 | Serine carboxypeptidase 1                                |
| SL4.0ch04 | 61614236 | 61614267 | Solyc04g079040.4 | Serine carboxypeptidase 1                                |
| SL4.0ch04 | 61624590 | 61624621 | Solyc04g079060.3 |                                                          |
| SL4.0ch04 | 61638416 | 61638447 |                  |                                                          |
| SL4.0ch04 | 61638447 | 61638478 |                  |                                                          |
| SL4.0ch04 | 61647313 | 61647344 |                  |                                                          |
| SL4.0ch04 | 61718582 | 61718613 | Solyc04g079170.4 | Unknown Protein                                          |
| SL4.0ch04 | 61718613 | 61718644 | Solyc04g079170.4 | Unknown Protein                                          |
| SL4.0ch04 | 61746451 | 61746482 |                  |                                                          |
| SL4.0ch04 | 61829748 | 61829779 |                  |                                                          |
| SL4.0ch04 | 62233833 | 62233864 |                  |                                                          |
| SL4.0ch04 | 62257207 | 62257238 |                  |                                                          |
| SL4.0ch04 | 62257238 | 62257269 |                  |                                                          |
| SL4.0ch04 | 62257269 | 62257300 |                  |                                                          |
| SL4.0ch04 | 62257858 | 62257889 |                  |                                                          |
| SL4.0ch04 | 62365583 | 62365614 |                  |                                                          |
| SL4.0ch04 | 62513856 | 62513887 |                  |                                                          |
| SL4.0ch04 | 62513887 | 62513918 |                  |                                                          |
| SL4.0ch04 | 62631005 | 62631036 |                  |                                                          |
| SL4.0ch04 | 62651465 | 62651496 |                  |                                                          |
| SL4.0ch04 | 62774163 | 62774194 | Solyc04g080710.4 | BHLH transcription factor-like protein                   |
| SL4.0ch04 | 62819516 | 62819547 |                  |                                                          |
| SL4.0ch04 | 62819547 | 62819578 |                  |                                                          |
| SL4.0ch04 | 62819578 | 62819609 |                  |                                                          |
| SL4.0ch04 | 62826677 | 62826708 |                  |                                                          |
| SL4.0ch04 | 62826708 | 62826739 |                  |                                                          |
| SL4.0ch04 | 62835791 | 62835822 | Solyc04g080770.3 | GTP-binding protein hflX                                 |
| SL4.0ch04 | 62941253 | 62941284 | Solyc04g080915.1 |                                                          |
| SL4.0ch04 | 62944632 | 62944663 |                  |                                                          |
| SL4.0ch04 | 62944663 | 62944694 |                  |                                                          |
| SL4.0ch04 | 62944694 | 62944725 |                  |                                                          |
| SL4.0ch04 | 62944787 | 62944818 |                  |                                                          |
| SL4.0ch04 | 62955358 | 62955389 |                  |                                                          |
| SL4.0ch04 | 63026286 | 63026317 | Solyc04g080990.2 | C4-dicarboxylate transporter/malic acid transport family |
| SL4.0ch04 | 63026317 | 63026348 | Solyc04g080990.2 | C4-dicarboxylate transporter/malic acid transport family |
| SL4.0ch04 | 63141730 | 63141761 |                  |                                                          |
| SL4.0ch04 | 63141761 | 63141792 |                  |                                                          |
| SL4.0ch04 | 63216595 | 63216626 |                  |                                                          |
| SL4.0ch04 | 63230669 | 63230700 |                  |                                                          |
| SL4.0ch04 | 63230948 | 63230979 |                  |                                                          |
| SL4.0ch04 | 63267032 | 63267063 |                  |                                                          |
| SL4.0ch04 | 63267063 | 63267094 |                  |                                                          |
| SL4.0ch04 | 63267094 | 63267125 |                  |                                                          |
| SL4.0ch04 | 63269605 | 63269636 |                  |                                                          |
| SL4.0ch04 | 63303519 | 63303550 | Solyc04g081290.3 | Lysine decarboxylase-like protein                        |
| SL4.0ch04 | 63314214 | 63314245 |                  |                                                          |
| SL4.0ch04 | 63363845 | 63363876 |                  |                                                          |
| SL4.0ch04 | 63363876 | 63363907 |                  |                                                          |
| SL4.0ch04 | 63363907 | 63363938 |                  |                                                          |
| SL4.0ch04 | 63394411 | 63394442 | Solyc04g081450.3 | Unknown Protein                                          |
| SL4.0ch04 | 63432479 | 63432510 |                  |                                                          |
| SL4.0ch04 | 63432510 | 63432541 |                  |                                                          |
| SL4.0ch04 | 63451265 | 63451296 |                  |                                                          |
| SL4.0ch04 | 63451296 | 63451327 |                  |                                                          |

|           |          |          |                  |                                                                         |
|-----------|----------|----------|------------------|-------------------------------------------------------------------------|
| SL4.0ch04 | 63625113 | 63625144 |                  |                                                                         |
| SL4.0ch04 | 63655276 | 63655307 |                  |                                                                         |
| SL4.0ch04 | 63655307 | 63655338 |                  |                                                                         |
| SL4.0ch04 | 63655338 | 63655369 |                  |                                                                         |
| SL4.0ch04 | 63733799 | 63733830 |                  |                                                                         |
| SL4.0ch04 | 63746075 | 63746106 | Solyc04g081910.4 | Calcium-dependent protein kinase                                        |
| SL4.0ch04 | 63803518 | 63803549 |                  |                                                                         |
| SL4.0ch04 | 63803580 | 63803611 |                  |                                                                         |
| SL4.0ch04 | 63812632 | 63812663 |                  |                                                                         |
| SL4.0ch04 | 63872307 | 63872338 |                  |                                                                         |
| SL4.0ch04 | 63872338 | 63872369 |                  |                                                                         |
| SL4.0ch04 | 63932199 | 63932230 |                  |                                                                         |
| SL4.0ch04 | 63932230 | 63932261 |                  |                                                                         |
| SL4.0ch04 | 63955759 | 63955790 | Solyc04g082260.4 | Receptor protein kinase-like protein                                    |
| SL4.0ch04 | 63955790 | 63955821 | Solyc04g082260.4 | Receptor protein kinase-like protein                                    |
| SL4.0ch04 | 64087075 | 64087106 |                  |                                                                         |
| SL4.0ch04 | 64128150 | 64128181 |                  |                                                                         |
| SL4.0ch04 | 64154779 | 64154810 | Solyc04g082540.2 | Dolichyl-diphosphooligosaccharide-protein glycosyltransferase subunit 1 |
| SL4.0ch04 | 64154810 | 64154841 | Solyc04g082540.2 | Dolichyl-diphosphooligosaccharide-protein glycosyltransferase subunit 1 |
| SL4.0ch04 | 64227009 | 64227040 |                  |                                                                         |
| SL4.0ch04 | 64227040 | 64227071 |                  |                                                                         |
| SL4.0ch04 | 64227071 | 64227102 |                  |                                                                         |
| SL4.0ch04 | 64241052 | 64241083 | Solyc04g082670.4 | SWI/SNF complex subunit SMARCC1                                         |
| SL4.0ch04 | 64253607 | 64253638 |                  |                                                                         |
| SL4.0ch04 | 64289629 | 64289660 | Solyc04g082760.3 | SWI/SNF complex subunit SMARCC1                                         |
| SL4.0ch04 | 64289660 | 64289691 | Solyc04g082760.3 | SWI/SNF complex subunit SMARCC1                                         |
| SL4.0ch04 | 64298867 | 64298898 | Solyc04g082780.3 | Cinnamoyl CoA reductase-like 1                                          |
| SL4.0ch04 | 64317405 | 64317436 | Solyc04g082810.4 | AT-hook DNA-binding protein                                             |
| SL4.0ch05 | 8538268  | 8538299  |                  |                                                                         |
| SL4.0ch05 | 23630401 | 23630432 |                  |                                                                         |
| SL4.0ch05 | 28133275 | 28133306 |                  |                                                                         |
| SL4.0ch05 | 56643851 | 56643882 |                  |                                                                         |
| SL4.0ch06 | 2570458  | 2570489  |                  |                                                                         |
| SL4.0ch06 | 25828611 | 25828642 |                  |                                                                         |
| SL4.0ch07 | 29571675 | 29571706 |                  |                                                                         |
| SL4.0ch07 | 29571706 | 29571737 |                  |                                                                         |
| SL4.0ch07 | 32874601 | 32874632 | Solyc07g026930.3 | Tetracycline transporter                                                |
| SL4.0ch07 | 33550773 | 33550804 |                  |                                                                         |
| SL4.0ch07 | 33550804 | 33550835 |                  |                                                                         |
| SL4.0ch07 | 33550835 | 33550866 |                  |                                                                         |
| SL4.0ch07 | 33550866 | 33550897 |                  |                                                                         |
| SL4.0ch07 | 33550897 | 33550928 |                  |                                                                         |
| SL4.0ch07 | 33550928 | 33550959 |                  |                                                                         |
| SL4.0ch07 | 33553656 | 33553687 |                  |                                                                         |
| SL4.0ch08 | 1507902  | 1507933  | Solyc08g006930.3 | Photosystem I reaction center subunit X psaK                            |
| SL4.0ch09 | 9828240  | 9828271  |                  |                                                                         |
| SL4.0ch09 | 19395026 | 19395057 |                  |                                                                         |
| SL4.0ch09 | 61438280 | 61438311 |                  |                                                                         |
| SL4.0ch09 | 62162223 | 62162254 |                  |                                                                         |
| SL4.0ch09 | 66761042 | 66761073 |                  |                                                                         |
| SL4.0ch11 | 47942554 | 47942585 |                  |                                                                         |
| SL4.0ch11 | 52125818 | 52125849 |                  |                                                                         |

---

**Table S4.** Genes mapped on QTL on chromosome 7.

| SGN ITAG 3.2            | Physical position | Gene function                                                                |
|-------------------------|-------------------|------------------------------------------------------------------------------|
| <i>Solyc07g006550</i>   | 1370920..1371769  | Ribonuclease S-6                                                             |
| <i>Solyc07g006560</i>   | 1375314..1372873  | Hypersensitive response assisting protein                                    |
| <i>Solyc07g006570</i>   | 1383245..1385020  | Ribonuclease                                                                 |
| <i>Solyc07g006580</i>   | 1387336..1406636  | Diacylglycerol kinase                                                        |
| <i>Solyc07g006590</i>   | 1425532..1425798  | Kinase superfamily with octicosapeptide/Phox/Bem1p domain-containing protein |
| <i>Solyc07g006600</i>   | 1448390..1448947  | Glutamine dumper 3                                                           |
| <i>Solyc07g006610</i>   | 1469104..1474046  | Tyrosine kinase family protein                                               |
| <i>Solyc07g006620</i>   | 1480278..1487817  | Receptor-like kinase                                                         |
| <i>Solyc07g006630</i>   | 1496758..1494884  | CONSTANS-like protein                                                        |
| <i>Solyc07g006640</i>   | 1506409..1518012  | ADP-ribosylation factor family protein                                       |
| <i>Solyc07g006650.2</i> | 1523093..1516230  | Xylose isomerase                                                             |
| <i>Solyc07g006660</i>   | 1526859..1525198  | Glyoxal oxidase-related protein                                              |
| <i>Solyc07g006670</i>   | 1528452..1529837  | HXXXD-type acyl-transferase family protein                                   |
| <i>Solyc07g006680</i>   | 1533723..1535081  | HXXXD-type acyl-transferase family protein                                   |
| <i>Solyc07g006690</i>   | 1558351..1547717  | alpha/beta-Hydrolases superfamily protein                                    |

**Computer Code S1.** Computer code developed for the Bulk Segregant Analysis (BSA).

Modified\_CoSSA\_v1\_WUR. For the analysis a bash script with tools BWA, SAMtools, Mosdepth and KMC were used to process and analyze the data. Boundary computation and visualization of the results were done using a Jupyter Notebook.
